# Supplementary material for: Purification of Hollow Sporopollenin Microcapsules from Sunflower and Chamomile Pollen Grains
Source: MDPI journal article supplement (doi:10.3390/polym13132094), 2021-06-25
Supplement: s1 [file s1]

Supporting material

# Purification of Hollow Sporopollenin Microcapsules from Sunflower and Chamomile Pollen Grains

Jose Manuel Ageitos, Sandra Robla, Lorena Valverde-Fraga, Marcos Garcia-Fuentes and Noemi Csaba\*

Centre for Research in Molecular Medicine and Chronic Diseases (CiMUS), Dept. Pharmacology, Pharmacy and Pharmaceutical Technology, School of Pharmacy, Universidade de Santiago de Compostela, 15782 Santiago de Compostela, Spain; josemanuel.ageitos@gmail.com (J.M.A.); sandra.robla@outlook.es (S.R.); lorena.valverde@rai.usc.es (L.V.-F.); marcos.garcia@usc.es (M.G.-F.)

\*Correspondence: noemi.csaba@usc.es (N.C.)

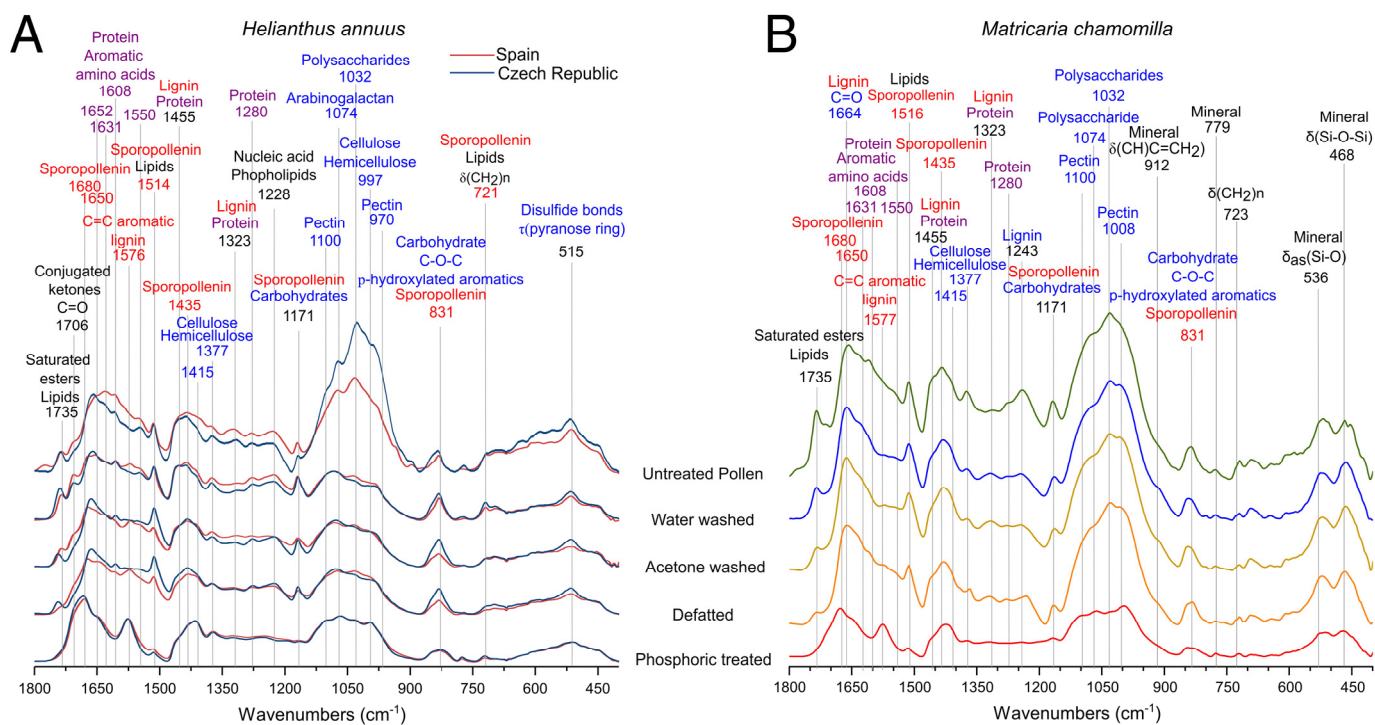

**Figure S1.** ATR-FTIR spectra of pollen samples. A. Comparison spectra of sunflower pollen from Spain and Czech Republic. B. Spectra of chamomile pollen treated with extended extraction protocol.

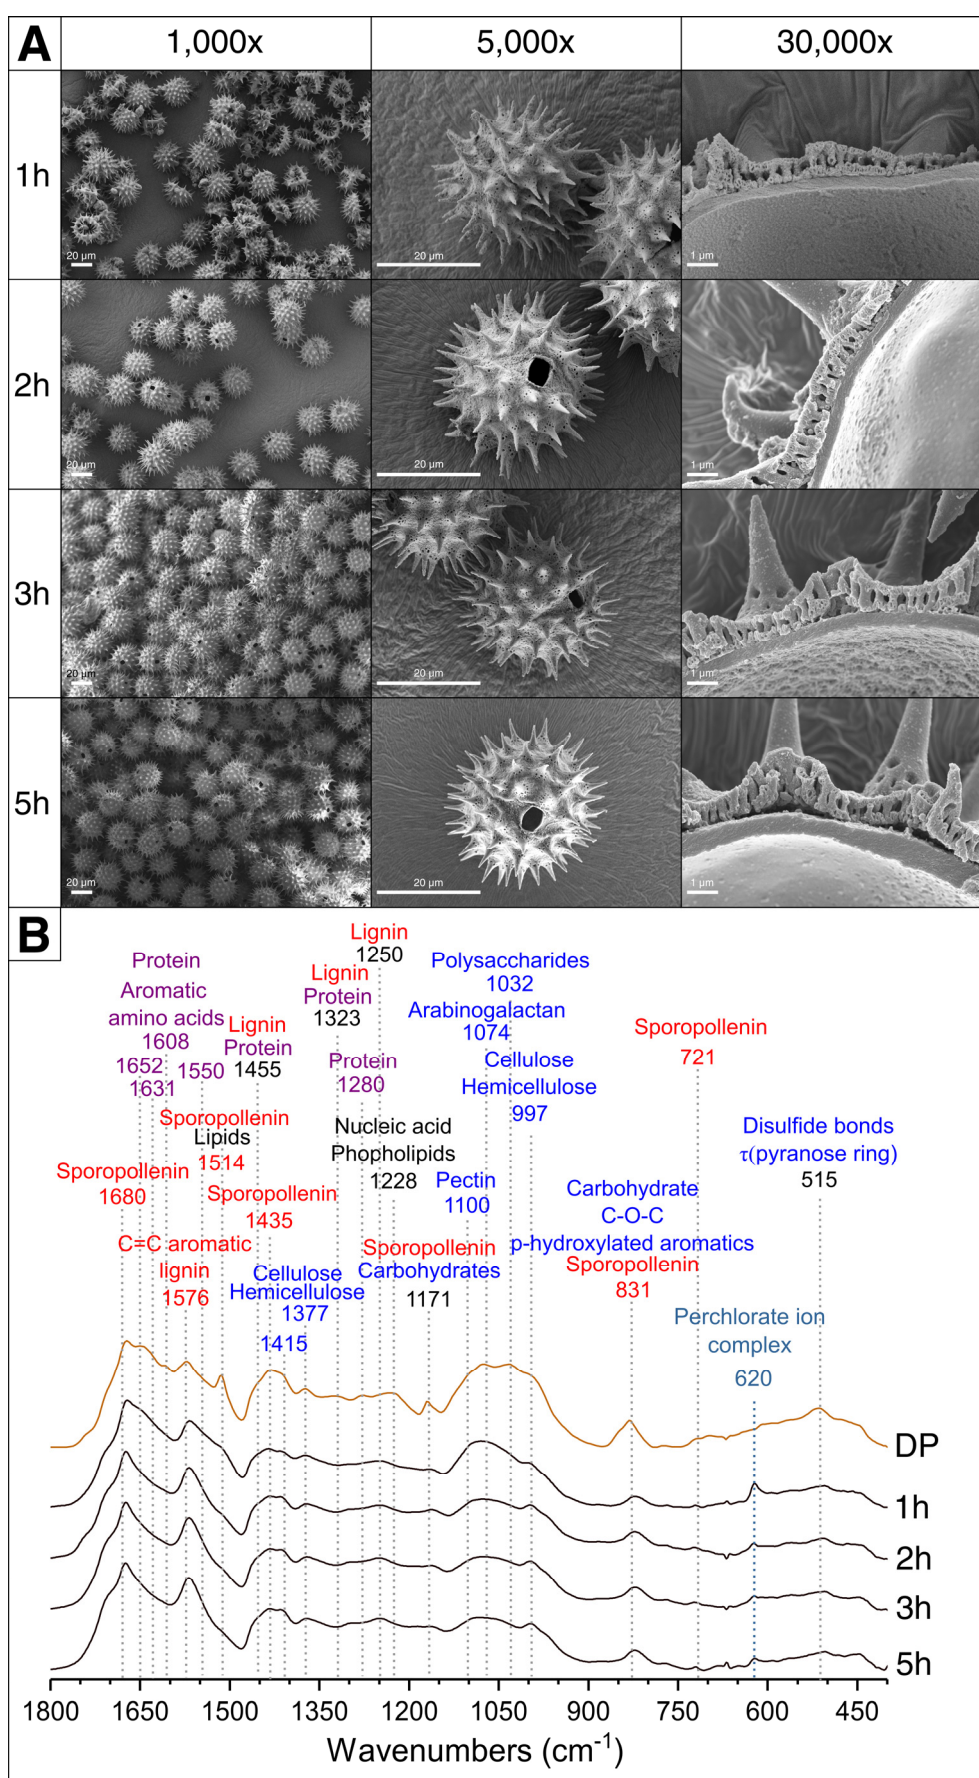

**Figure S2.** Time course study of the treatment of defatted sunflower (DP) treated with  $\text{HClO}_4$  during different time periods. **A.** SEM images at different magnifications. **B.** ATR-FTIR spectra of pollen samples indicating the band assignment.

**Table S1.** Principal characteristics of sunflower and chamomile pollen samples.

|                                                    | Sunflower              |                        | Chamomile              |                        |
|----------------------------------------------------|------------------------|------------------------|------------------------|------------------------|
|                                                    | Defatted               | Hollow                 | Defatted               | Hollow                 |
| <i>Total diameter (<math>\mu\text{m}</math>)</i>   | $42.9 \pm 1.9$         | $35.0 \pm 2.0$         | $24.8 \pm 1.1$         | $20.2 \pm 1.3$         |
| <i>Inner diameter (<math>\mu\text{m}</math>)</i>   | -                      | $24.7 \pm 0.9$         | -                      | $12.1 \pm 0.7$         |
| <i>Density (<math>\text{g}/\text{cm}^3</math>)</i> | $0.38 \pm 0.06$        | $0.13 \pm 0.01$        | $0.44 \pm 0.02$        | $0.14 \pm 0.01$        |
| <i>Grains per gram</i>                             | $\sim 9.0 \times 10^7$ | $\sim 2.5 \times 10^8$ | $\sim 5.1 \times 10^8$ | $\sim 1.0 \times 10^9$ |
| <i>Grains per <math>\text{cm}^3</math></i>         | $\sim 3.4 \times 10^7$ | $\sim 3.3 \times 10^7$ | $\sim 2.2 \times 10^8$ | $\sim 1.4 \times 10^8$ |
| <i>Nitrogen content (%)</i>                        | $6.42 \pm 0.67$        | $0.70 \pm 0.13$        | $3.52 \pm 0.30$        | $0.64 \pm 0.21$        |
| <i>Protein content (%)</i>                         | $40.1 \pm 4.2$         | $4.4 \pm 0.8$          | $22.0 \pm 1.9$         | $4.0 \pm 1.3$          |

**Table S2.** TGA results for sunflower and chamomile pollen samples.

| Sunflower pollen                          |                              |                      |                                           |                              |                      |                                           |                              |                      |
|-------------------------------------------|------------------------------|----------------------|-------------------------------------------|------------------------------|----------------------|-------------------------------------------|------------------------------|----------------------|
| Untreated pollen                          |                              |                      | Defatted pollen                           |                              |                      | Hollow pollen                             |                              |                      |
| $T_{\text{onset}}$ ( $^{\circ}\text{C}$ ) | $T_d$ ( $^{\circ}\text{C}$ ) | $\Delta\text{W}$ (%) | $T_{\text{onset}}$ ( $^{\circ}\text{C}$ ) | $T_d$ ( $^{\circ}\text{C}$ ) | $\Delta\text{W}$ (%) | $T_{\text{onset}}$ ( $^{\circ}\text{C}$ ) | $T_d$ ( $^{\circ}\text{C}$ ) | $\Delta\text{W}$ (%) |
| 30-107                                    | 54                           | 6                    | 30-137                                    | 52                           | 2                    | 30-137                                    | 47                           | 2                    |
| 108-175                                   | 153                          | 2                    | 138-289                                   | 284                          | 13                   | 138-247                                   | 200                          | 6                    |
| 176-257                                   | 235                          | 14                   | 290-405                                   | 326                          | 38                   | 248-369                                   | 316                          | 8                    |
| 258-310                                   | 272                          | 16                   | 406-529                                   | 439                          | 21                   | 370-531                                   | 442                          | 39                   |
| 311-386                                   | 316                          | 20                   | 530-800                                   | -                            | 3                    | 532-800                                   | -                            | 3                    |
| 387-490                                   | 425                          | 16                   | Ash                                       |                              | 24                   | Ash                                       |                              | 42                   |
| 491-800                                   | -                            | 5                    |                                           |                              |                      |                                           |                              |                      |
| Ash                                       |                              | 20                   |                                           |                              |                      |                                           |                              |                      |
| Chamomile pollen                          |                              |                      |                                           |                              |                      |                                           |                              |                      |
| Untreated pollen                          |                              |                      | Defatted pollen                           |                              |                      | Hollow pollen                             |                              |                      |
| $T_{\text{onset}}$ ( $^{\circ}\text{C}$ ) | $T_d$ ( $^{\circ}\text{C}$ ) | $\Delta\text{W}$ (%) | $T_{\text{onset}}$ ( $^{\circ}\text{C}$ ) | $T_d$ ( $^{\circ}\text{C}$ ) | $\Delta\text{W}$ (%) | $T_{\text{onset}}$ ( $^{\circ}\text{C}$ ) | $T_d$ ( $^{\circ}\text{C}$ ) | $\Delta\text{W}$ (%) |
| 30-99                                     | 56                           | 2                    | 30-111                                    | 52                           | 3                    | 30-111                                    | 47                           | 2                    |
| 100-175                                   | 145                          | 5                    | 112-285                                   | 270                          | 11                   | 112-352                                   | 304                          | 16                   |
| 176-244                                   | 218                          | 8                    | 285-382                                   | 325                          | 24                   | 353-550                                   | 451                          | 41                   |
| 245-282                                   | 270                          | 6                    | 383-507                                   | 448                          | 21                   | 551-800                                   | -                            | 2                    |
| 283-361                                   | 308                          | 15                   | 508-703                                   | 674                          | 6                    | Ash                                       |                              | 39                   |
| 362-429                                   | 404                          | 8                    | 704-800                                   | -                            | 3                    |                                           |                              |                      |
| 430-506                                   | 450                          | 6                    | Ash                                       |                              | 32                   |                                           |                              |                      |
| 507-590                                   | 515                          | 3                    |                                           |                              |                      |                                           |                              |                      |
| 591-692                                   | 644                          | 5                    |                                           |                              |                      |                                           |                              |                      |
| 693-800                                   | -                            | 2                    |                                           |                              |                      |                                           |                              |                      |
| Ash                                       |                              | 40                   |                                           |                              |                      |                                           |                              |                      |

$T_{\text{onset}}$ ; range of temperatures in the thermal decomposition.  $T_d$ : degradation temperature,  $\Delta\text{W}$ : variation of mass occurred in the  $T_{\text{onset}}$ .
